# Supplementary material
Source: HighWire-hosted journal article supplement (https://www.g3journal.org/content/suppl/2015/03/17/g3.114.015784)
Supplement: TableS3.pdf [file TableS3.pdf]

**Table S3 Full names of 1000 Genomes Project populations.**

| Code    | Population name                                              |
|---------|--------------------------------------------------------------|
| ASW     | African Ancestry from Southwest, USA                         |
| CEU     | Northern and Western European from Utah, USA                 |
| CHB+JPT | Han Chinese from Beijing, China + Japanese from Tokyo, Japan |
| CHS     | Han from south, China                                        |
| CLM     | Colombian from Medellin, Colombia                            |
| FIN     | Finnish, Finland                                             |
| GBR     | British from England and Scotland, UK                        |
| LWK     | Luhya from Webuye, Kenya                                     |
| MXL     | Mexican Ancestry from Los Angeles-California, USA            |
| PUR     | Puerto Rican, Puerto Rico                                    |
| TSI     | Italian from Tuscany, Italy                                  |
| YRI     | Yoruba from Ibadan, Nigeria                                  |
